# Supplementary material for: Screening and surveillance of multiple solid tumours using plasma placental-like chondroitin sulfate A (pl-CSA)
Source: PubMed Central journal article supplement (PMC6990888; doi:10.7150/ijms.39444), 2020-01-01
Supplement: ijmsv17p0161s1.pdf [file ijmsv17p0161s1.pdf]

## 1 **Supplementary methods**

### 2 **PI-CSA purification**

3 As in our previous study, the affinity protein rVAR2 was used for the purification of pl-CSA. The  
4 purified rVAR2 was quantified using an Easy II Protein Quantitative kit (BCA) (Cat. No. DQ111-01,  
5 Transgen Biotech Co., Ltd., Beijing, China). The 4% N-hydroxysuccinimide (NHS)-activated agarose  
6 reacted with 1-ethyl-3-(3-dimethylamino) propyl carbodiimide (EDC) in 100 mM  
7 4-morpholinoethanesulfonic acid (MES) solution (pH 5.5) (Cat. No. SA039500, Smart Lifesciences,  
8 Changzhou, China) at room temperature (RT) for 2 h. Then, the rVAR2 protein was coupled to  
9 activated agarose at a concentration of 1 mg/g at RT for 24 h. The uncoupled rVAR2 was removed by  
10 washing with PBS (pH 7.2). An affinity column was filled with the prepared agarose for pl-CSA  
11 purification.

12

13 The crude pl-CSA sample was obtained from HTR8 cells using an enzyme microwave-assisted  
14 method with lysis buffer (pH 8.0) containing 1 IU/ml RNase, 2 IU/ml DNase, and 1 µg/ml protease K.  
15 The sample was treated with microwaves at 37 °C for 30 min and incubated at 4 °C for 16 h; then,  
16 enzyme inactivation was performed at 85 °C for 2 min, and the sample was passed through a 0.45-µm  
17 filter. The purified pl-CSA was collected using an rVAR2 affinity column at a ratio of 1 ml of crude  
18 pl-CSA per 1 ml of column, in which PBS (pH 7.2) was used as a washing solution and 0.10 M glycine  
19 buffer (pH 3.0) served as the elution buffer. Then, the purified pl-CSA was deionized, freeze-dried and  
20 stored at -80 °C for the following experiments.

21

### 22 **Mouse immunization**

23 The pl-CSA vaccine was produced through emulsification with Freund's complete adjuvant or  
24 Freund's incomplete adjuvant. Ten BALB/c mice were vaccinated subcutaneously with the pl-CSA  
25 vaccine at an interval of one week. The mice were immunized with vaccine in Freund's complete  
26 adjuvant in the first and second weeks, with vaccine in Freund's incomplete adjuvant in the third and  
27 fourth weeks, and with pl-CSA alone in the last week. The serum of immunized mice, which contained  
28 the anti-pl-CSA antibody, was collected. The pl-CSA antiserum was mixed and stored at -80 °C for ELISA  
29 analysis.

30

### 31 **Capture protein preparation**

32 To ascertain the appropriate concentration of pl-CSA-BP for coating the ELISA plates, a  
33 checkerboard titration was applied using the protocols described above (Table S1). In the first step,

34 the pl-CSA-BP was serially diluted 2-fold to generate a concentration gradient (range, 3.13 µg/ml to  
35 100.00 µg/ml). In the third step, the pl-CSA was serially diluted 10-fold to generate standard samples  
36 for the concentration gradient. In the fourth step, the anti-pl-CSA antibody was tested at a 1:1,000  
37 dilution.

38

#### 39 **Optimization of the anti-pl-CSA antibody dilution ratio**

40 The optimum anti-pl-CSA antibody dilution ratio was determined by checkerboard titration based  
41 on the above-described protocols (Table S2). In the third step, the pl-CSA standards were generated by  
42 serial 2-fold dilution, each with twelve replicates. Subsequently, the pl-CSA antiserum and mouse  
43 control serum were serially diluted 10-fold, with 3 replicates of each dilution.

44

#### 45 **Determination of the specificity, sensitivity and repeatability of the ELISA kit**

46 Based on the above-described protocols, in the third step, serial 2-fold dilutions of purified  
47 pl-CSA were used as standards to determine the sensitivity (range, 0.31 µg/ml to 5,000.00 µg/ml) and  
48 repeatability (range, 3.91 µg/ml to 500.00 µg/ml). The concentration of purified pl-CSA was  
49 log<sub>2</sub>-transformed, and the resulting values exhibited a linear relationship with the OD<sub>450</sub>. The assay  
50 was repeated more than three times to determine the sensitivity and repeatability. CSB (500.00 µg/ml)  
51 and CSC (500.00 µg/ml) were also detected to determine the specificity. The reliability was confirmed  
52 according to P/N≥2.1.

53

#### 54 **Cell culture**

55 Most cell lines were obtained from American Type Tissue Collection (ATCC, Manassas, USA) and  
56 maintained in our laboratory. Cell lines were cultured in appropriate media supplemented with 10%  
57 foetal bovine serum (FBS), 100.00 IU/ml penicillin, and 100.00 µg/ml streptomycin. The HTR8 cell line  
58 (a kind gift from Professor Charles Graham, Department of Anatomy and Cell Biology, Queen's  
59 University, Kingston, ON, Canada) was used as a positive control, and the 11 cancer cell lines and 6  
60 normal cell lines are shown in Table S4. When the cells reached 90% confluence, they were washed  
61 twice with PBS and cultured in FBS-free media for 48 h. Then, the culture supernatants were collected  
62 and condensed 5 times, and the cells were resuspended at approximately 10<sup>6</sup> cells/ml and lysed in  
63 lysis buffer for pl-CSA detection. Additionally, trophoblastic HTR8 cells were expanded for pl-CSA  
64 separation and purification.

65 **Supplementary Table 1.** The appropriate concentration of pI-CSA binding peptide (pI-CSA-BP) was  
 66 identified through checkerboard titration.

| OD450                          |           | pI-CSA-BP ( $\mu\text{g/ml}$ ) |        |        |        |       |       |
|--------------------------------|-----------|--------------------------------|--------|--------|--------|-------|-------|
|                                |           | 100.000                        | 50.000 | 25.000 | 12.500 | 6.250 | 3.125 |
| pI-CSA<br>( $\mu\text{g/ml}$ ) | 5,000.000 | 3.297                          | 3.311  | 3.387  | 3.151  | 2.987 | 2.566 |
|                                | 500.000   | 1.944                          | 1.959  | 1.988  | 1.979  | 1.941 | 1.918 |
|                                | 50.000    | 1.102                          | 1.013  | 1.091  | 1.161  | 1.079 | 1.081 |
|                                | 5.000     | 0.401                          | 0.402  | 0.415  | 0.409  | 0.403 | 0.415 |

67 Note: An assigned dilution (1:1,000) of the anti-pI-CSA antibody was used in this assay.

68 **Supplementary Table 2.** The optimum anti-pl-CSA antibody dilution ratio was determined through  
 69 checkerboard titration.

| OD450     |                | pl-CSA ( $\mu\text{g/ml}$ ) |       |        |        |        |         |         |         |
|-----------|----------------|-----------------------------|-------|--------|--------|--------|---------|---------|---------|
|           |                | 3.906                       | 7.813 | 15.625 | 31.250 | 62.500 | 125.000 | 250.000 | 500.000 |
| 1:100     | Positive serum | 0.659                       | 1.018 | 1.254  | 1.491  | 1.850  | 2.067   | 2.554   | 2.573   |
|           | Negative serum | 0.258                       | 0.273 | 0.278  | 0.272  | 0.292  | 0.282   | 0.307   | 0.303   |
|           | P/N            | 2.558                       | 3.726 | 4.512  | 5.488  | 6.334  | 7.344   | 8.326   | 8.485   |
| 1:1,000   | Positive serum | 0.247                       | 0.442 | 0.717  | 1.064  | 1.495  | 1.835   | 2.084   | 2.497   |
|           | Negative serum | 0.086                       | 0.088 | 0.089  | 0.099  | 0.101  | 0.099   | 0.101   | 0.095   |
|           | P/N            | 2.873                       | 5.025 | 8.107  | 10.751 | 14.876 | 18.534  | 20.735  | 26.419  |
| 1:10,000  | Positive serum | 0.221                       | 0.229 | 0.399  | 0.552  | 0.775  | 0.954   | 1.082   | 1.266   |
|           | Negative serum | 0.095                       | 0.092 | 0.096  | 0.109  | 0.110  | 0.109   | 0.110   | 0.103   |
|           | P/N            | 2.331                       | 2.495 | 4.156  | 5.086  | 7.020  | 8.781   | 9.801   | 12.267  |
| 1:100,000 | Positive serum | 0.206                       | 0.225 | 0.299  | 0.414  | 0.581  | 0.715   | 0.812   | 0.950   |
|           | Negative serum | 0.091                       | 0.095 | 0.092  | 0.104  | 0.106  | 0.104   | 0.106   | 0.099   |
|           | P/N            | 2.274                       | 2.373 | 3.260  | 3.968  | 5.473  | 6.851   | 7.641   | 9.591   |

70 Note: The 96-microwell plate was coated with 25  $\mu\text{g/ml}$  pl-CSA-BP (200  $\mu\text{l/well}$ ) in 50 mM carbonate  
 71 buffer (pH 9.6). P/N  $\geq 2.1$  was used to indicate reliable values.

72 **Supplementary Table 3.** The specificity of the ELISA for pI-CSA using CSB and CSC.

| OD450 | Negative control | CSB (500 µg/ml) | CSC (500 µg/ml) | pI-CSA (125 µg/ml) |
|-------|------------------|-----------------|-----------------|--------------------|
| 1     | 0.102            | 0.121           | 0.116           | 1.699              |
| 2     | 0.106            | 0.107           | 0.108           | 1.732              |
| 3     | 0.110            | 0.134           | 0.108           | 1.765              |
| 4     | 0.104            | 0.098           | 0.112           | 1.753              |

73 Note: PBST was used as a negative control.

74 **Supplementary Table 4.** The cell lines used in this study to evaluate cell culture supernatants and  
 75 lysates by the developed ELISA.

| Serial No. | Cell line      | Category               | Group             | Samples                                                              |
|------------|----------------|------------------------|-------------------|----------------------------------------------------------------------|
| 1          | HTR8           | Trophoblast            | Positive control  |                                                                      |
| 2          | A2780          | Ovarian cancer         |                   |                                                                      |
| 3          | KYSE-150       | Oesophageal cancer     |                   |                                                                      |
| 4          | SKOV3          | Ovarian cancer         |                   |                                                                      |
| 5          | SW872          | Liposarcoma            |                   |                                                                      |
| 6          | A549           | Lung adenocarcinoma    |                   |                                                                      |
| 7          | Hep-G2         | Hepatocellular cancer  | Cancer cell lines | Two cell lysate samples and 2 supernatant samples for each cell line |
| 8          | MCF7           | Breast cancer          |                   |                                                                      |
| 9          | Sp2/0          | Myeloma                |                   |                                                                      |
| 10         | MLTC-1         | Leydig cancer          |                   |                                                                      |
| 11         | RM-1           | Prostate cancer        |                   |                                                                      |
| 12         | $\alpha$ TC1-9 | Pancreatic cancer      |                   |                                                                      |
| 13         | Het-1A         | Oesophageal epithelial |                   |                                                                      |
| 14         | BEAS-2B        | Lung epithelial        |                   |                                                                      |
| 15         | LO2            | Hepatocyte             | Normal cell lines |                                                                      |
| 16         | CHO            | Ovarian epithelial     |                   |                                                                      |
| 17         | 3T3-L1         | Embryonic fibroblast   |                   |                                                                      |
| 18         | NCTC-1469      | Liver epithelial       |                   |                                                                      |

76

77 **Supplementary Table 5.** ESCC samples were collected from the Department of Oncology of Wuzhou  
78 People's Hospital (Wuzhou, China). Ovarian and cervical cancer samples were collected from Nanshan  
79 Affiliated Hospital of Shenzhen University (Shenzhen, China). NSCLC samples were obtained from  
80 patients who underwent surgical resection at the Department of Thoracic Surgery of The First  
81 Affiliated Hospital of Shenzhen University School of Medicine (Shenzhen, China). The mean age of the  
82 ESCC patients (8 females and 40 males) was 62 years. Of the oesophageal cancer patients, 7 were  
83 treated with surgery, and 12 were treated with chemotherapy. Samples were collected from the same  
84 patients with oesophageal cancer before and after surgery or chemotherapy. The malignancies were  
85 early-stage in 21 patients and late-stage in 27 patients. The mean age of the ovarian cancer patients  
86 was 60 years, and 7 patients had early-stage disease. The mean age of the cervical cancer patients was  
87 62 years, and 7 patients had early-stage disease. The mean age of the NSCLC patients (19 females and  
88 13 males) was 57 years, and 20 of these patients underwent surgery. Samples were collected from the  
89 same patients with NSCLC before and after surgery. The malignancies were early-stage in 24 patients  
90 and late-stage in 8 patients. The mean age of the healthy controls (21 females and 23 males) was 59  
91 years. ELISAs were performed according to the abovementioned protocols.

| Cancer samples     | Mean age | Females | Males | Pre- and post-surgery | Pre- and post-chemotherapy | Early-stage | Late-stage |
|--------------------|----------|---------|-------|-----------------------|----------------------------|-------------|------------|
| Oesophageal cancer | 62       | 8       | 40    | 7                     | 12                         | 21          | 27         |
| Ovarian cancer     | 60       | 7       | 0     | 0                     | 0                          | 7           | 0          |
| Cervical cancer    | 62       | 7       | 0     | 0                     | 0                          | 7           | 0          |
| Lung cancer        | 57       | 19      | 13    | 20                    | 0                          | 24          | 8          |
| Healthy controls   | 59       | 21      | 23    | /                     | /                          | /           | /          |

92

93 **Supplementary Table 6.** Tissue chips obtained from Suzhou Cancer Cell Biotechnology Co., Ltd.,  
94 included oesophageal cancer (cat No. ES1202; 10 × 12 1-mm holes/chip; 60 cases), lung cancer (cat No.  
95 BC04118a; 10 × 10 1-mm holes/chip; 50 cases), and corresponding normal adjacent tissue (NAT).

| Cat. No. | Cancer tissue      | Mean age | Females | Males | Early-stage | Late-stage |
|----------|--------------------|----------|---------|-------|-------------|------------|
| ES1202   | Oesophageal cancer | 57       | 34      | 26    | 55          | 5          |
| BC04118a | Lung cancer        | 57       | 12      | 38    | 43          | 7          |

96

97
